# Supplementary material for: Accuracy of Vitalograph lung monitor as a screening test for COPD in primary care
Source: PubMed Central journal article supplement (PMC6941963; doi:10.1038/s41533-019-0158-2), 2020-01-03
Supplement: 41533_2019_158_MOESM1_ESM.pdf [file 41533_2019_158_MOESM1_ESM.pdf]

Supplementary table 1: Screening accuracy of pre-bronchodilator lung monitor FEV<sub>1</sub>/FEV<sub>6</sub> cut-points, against post-BD confirmatory spirometry (FEV<sub>1</sub>/FVC <0.7)

|                                                 | TP  | FP  | TN  | FN  | Sens (95% CI)        | Spec (95% CI)        | PPV<br>(3% prevalence) | PPV<br>(6% prevalence) | PPV<br>(10% prevalence) |
|-------------------------------------------------|-----|-----|-----|-----|----------------------|----------------------|------------------------|------------------------|-------------------------|
| Pre-BD FEV <sub>1</sub> /FEV <sub>6</sub> ratio |     |     |     |     |                      |                      |                        |                        |                         |
| <0.4                                            | 6   | 0   | 131 | 407 | 1.5% (0.5%, 3.1%)    | 100% (97.2%, 100%)   | -                      | -                      | -                       |
| <0.5                                            | 34  | 0   | 131 | 379 | 8.2% (5.8%, 11.3%)   | 100% (97.2%, 100%)   | -                      | -                      | -                       |
| <0.6                                            | 89  | 0   | 131 | 324 | 21.6% (17.7%, 25.8%) | 100% (97.2%, 100%)   | -                      | -                      | -                       |
| <0.7                                            | 200 | 0   | 131 | 213 | 48.4% (43.5%, 53.4%) | 100% (97.2%, 100%)   | -                      | -                      | -                       |
| <0.71                                           | 210 | 1   | 130 | 203 | 50.9% (45.9%, 55.8%) | 99.2% (95.8%, 100%)  | 0.67 (0.23, 0.94)      | 0.81 (0.38, 0.97)      | 0.88 (0.51, 0.98)       |
| <0.72                                           | 226 | 1   | 130 | 187 | 54.7% (49.8%, 59.6%) | 99.2% (95.8%, 100%)  | 0.69 (0.24, 0.94)      | 0.82 (0.39, 0.97)      | 0.89 (0.53, 0.98)       |
| <0.73                                           | 242 | 1   | 130 | 171 | 58.6% (53.7%, 63.4%) | 99.2% (95.8%, 100%)  | 0.70 (0.25, 0.94)      | 0.83 (0.41, 0.97)      | 0.90 (0.55, 0.98)       |
| <0.74                                           | 255 | 1   | 130 | 158 | 61.7% (56.9%, 66.5%) | 99.2% (95.8%, 100%)  | 0.71 (0.26, 0.95)      | 0.84 (0.42, 0.97)      | 0.90 (0.56, 0.98)       |
| <0.75                                           | 268 | 2   | 129 | 145 | 64.9% (60.1%, 69.5%) | 98.5% (94.6%, 99.8%) | 0.57 (0.33, 0.78)      | 0.73 (0.51, 0.88)      | 0.83 (0.64, 0.93)       |
| <0.76                                           | 285 | 4   | 127 | 128 | 69.0% (64.3%, 73.4%) | 97.0% (92.4%, 99.2%) | 0.41 (0.30, 0.53)      | 0.59 (0.47, 0.70)      | 0.72 (0.61, 0.80)       |
| <0.77                                           | 297 | 5   | 126 | 116 | 71.9% (67.3%, 76.2%) | 96.2% (91.3%, 98.7%) | 0.37 (0.29, 0.46)      | 0.55 (0.45, 0.64)      | 0.68 (0.59, 0.75)       |
| <0.78                                           | 304 | 6   | 125 | 109 | 73.6% (69.1%, 77.8%) | 95.4% (90.3%, 98.3%) | 0.33 (0.27, 0.40)      | 0.51 (0.43, 0.58)      | 0.64 (0.57, 0.71)       |
| <0.79                                           | 320 | 8   | 123 | 93  | 77.5% (73.1%, 81.4%) | 93.9% (88.3%, 97.3%) | 0.28 (0.24, 0.33)      | 0.45 (0.39, 0.51)      | 0.59 (0.53, 0.64)       |
| <0.8                                            | 335 | 8   | 123 | 78  | 81.1% (77.0%, 84.8%) | 93.9% (88.3%, 97.3%) | 0.29 (0.25, 0.34)      | 0.46 (0.40, 0.52)      | 0.60 (0.54, 0.65)       |
| <0.9                                            | 408 | 107 | 24  | 5   | 98.8% (97.2%, 99.6%) | 18.3% (12.1%, 26.0%) | 0.04 (0.04, 0.04)      | 0.07 (0.07, 0.07)      | 0.12 (0.12, 0.12)       |

TP = true positives, FP = false positives, TN = true negatives, FN = false negatives, sens = sensitivity, spec = specificity, PPV = positive predictive value

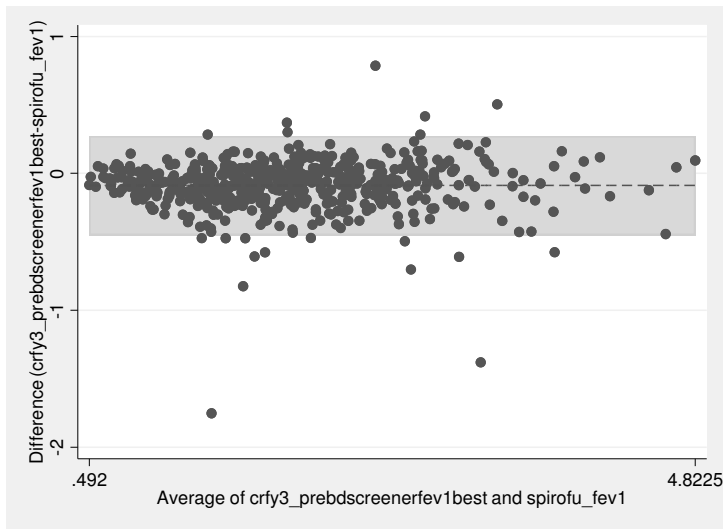

Supplementary figure 1: Bland Altman plot of FEV<sub>1</sub> agreement between pre-BD lung monitor and post-BD confirmatory spirometry

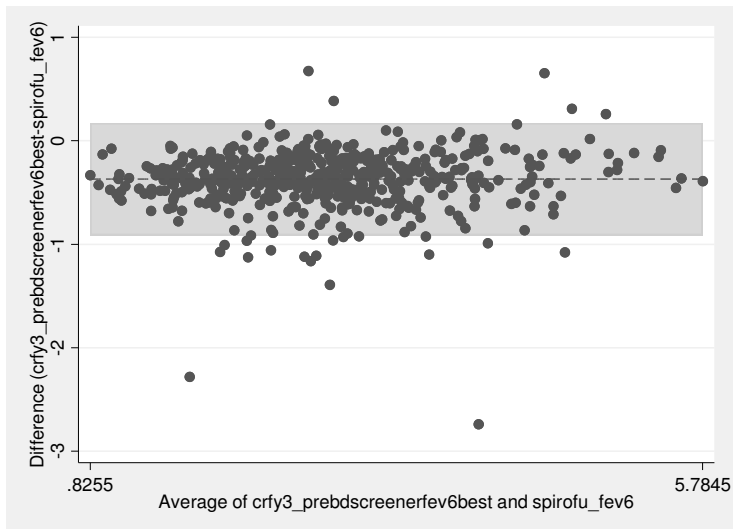

Supplementary figure 2: Bland Altman plot of FEV<sub>6</sub> agreement between pre-BD lung monitor and post-BD confirmatory spirometry

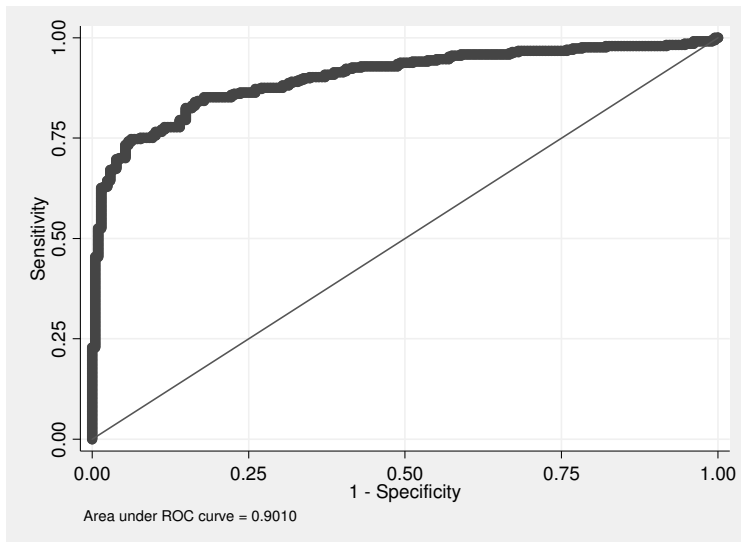

Supplementary figure 3: ROC curve for COPD diagnosis using pre-BD lung monitor ( $FEV_1/FEV_6 < LLN$ ) against post-BD confirmatory spirometry ( $FEV_1/FVC < LLN$ )

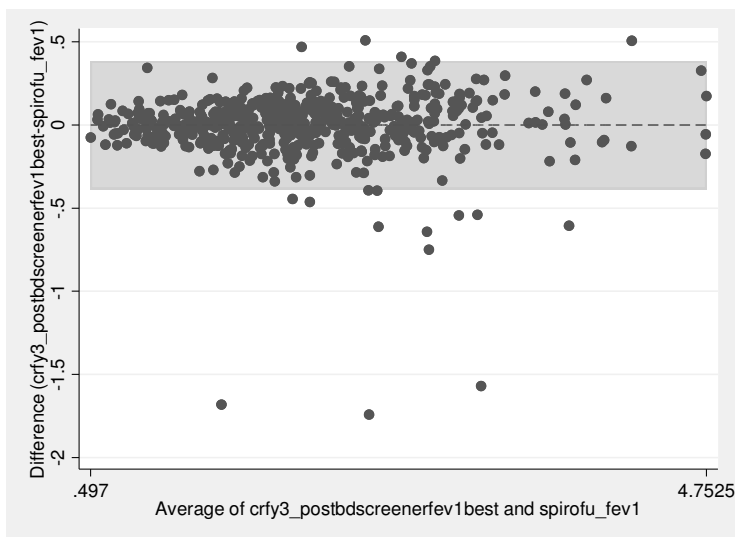

Supplementary figure 4: Bland Altman plot of post-BD  $FEV_1$  agreement between lung monitor and confirmatory spirometry

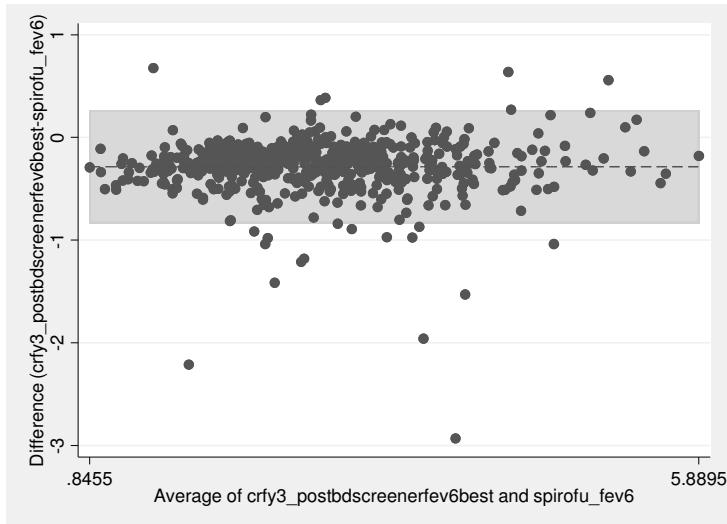

Supplementary figure 5: Bland Altman plot of post-BD FEV<sub>6</sub> agreement between lung monitor and confirmatory spirometry

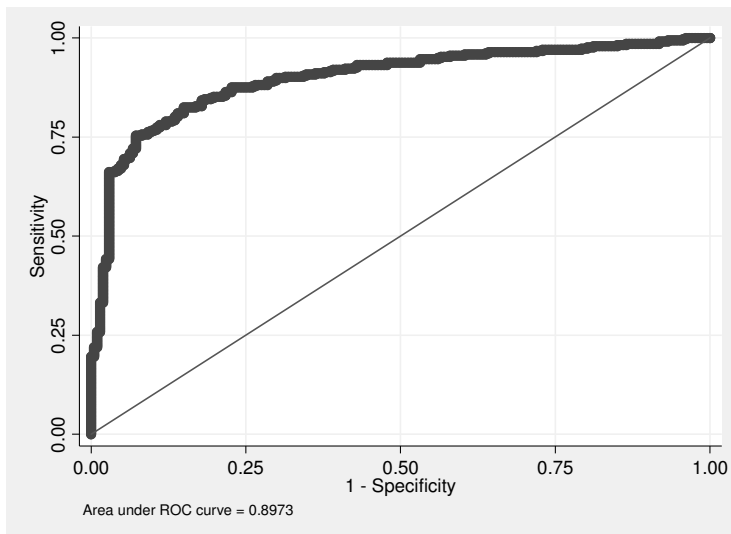

Supplementary figure 6: ROC curve for COPD diagnosis using post-BD lung monitor (FEV<sub>1</sub>/FEV<sub>6</sub> < LLN) against post-BD confirmatory spirometry (FEV<sub>1</sub>/FVC < LLN)

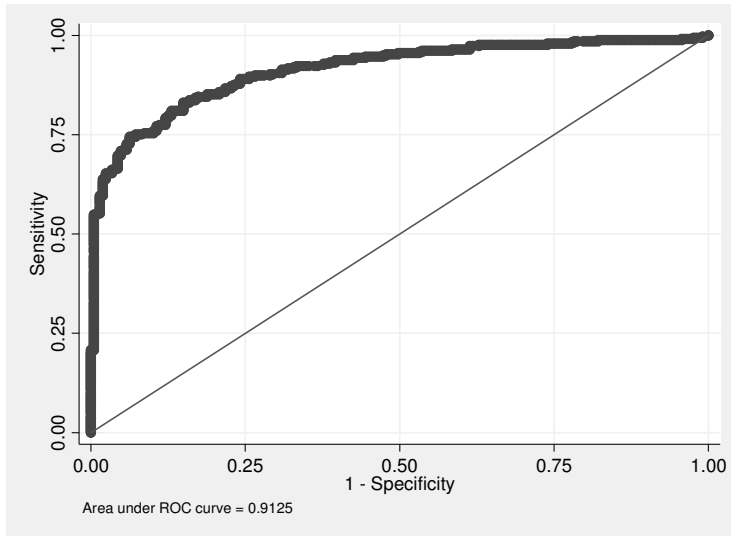

Supplementary figure 7: ROC curve for COPD diagnosis using pre-BD lung monitor ( $FEV_1/FEV_6 < 0.7$ ) against post-BD confirmatory spirometry ( $FEV_1/FVC < LLN$ )
